# Supplementary material for: Ginger Extract Ameliorates Obesity and Inflammation via Regulating MicroRNA-21/132 Expression and AMPK Activation in White Adipose Tissue
Source: PubMed Central journal article supplement (PMC6266584; doi:10.3390/nu10111567), 2018-10-23
Supplement: nutrients-10-01567-s001.pdf [file nutrients-10-01567-s001.pdf]

### Supplementary Table S1

Compositions of experimental diets (units: g/kg diet).

| <b>Component</b>         | <b>HF</b> | <b>HF + WEG</b> | <b>HF + HPG</b> |
|--------------------------|-----------|-----------------|-----------------|
| Casein                   | 238.79    | 238.79          | 238.79          |
| Corn starch              | 185.11    | 177.11          | 177.11          |
| Dextrose                 | 157.60    | 157.60          | 157.60          |
| Sucrose                  | 59.70     | 59.70           | 59.70           |
| Cellulose                | 59.70     | 59.70           | 59.70           |
| Soybean oil              | 29.85     | 29.85           | 29.85           |
| Lard                     | 208.94    | 208.94          | 208.94          |
| TBHQ                     | 0.02      | 0.02            | 0.02            |
| Mineral Mix <sup>1</sup> | 41.79     | 41.79           | 41.79           |
| Vitamin Mix <sup>2</sup> | 11.94     | 11.94           | 11.94           |
| L-Cystine                | 3.58      | 3.58            | 3.58            |
| Choline bitartrate       | 2.98      | 2.98            | 2.98            |
| WEG                      | -         | 8.00            | -               |
| HPG                      | -         | -               | 8.00            |
| Total                    | 1,000     | 1,000           | 1,000           |
| Fat, % (calories)        | 45        | 45              | 45              |

<sup>1</sup> AIN-93G Mineral Mix. <sup>2</sup> AIN-93G Vitamin Mix. The experimental diets were formulated with slight modification based on the D12541 diet composition (Research Diets). HF, high-fat diet; HF + WEG, high-fat diet with 0.8% hot water extract of ginger; HF + HPG, high-fat diet with 0.8% high hydrostatic pressure extract of ginger; TBHQ, tert-butylhydroquinone.

## Supplementary Table S2

Primers used for quantitative real-time PCR.

| Name           | GenBank No.  | Primer sequence (5'-3')                            | Amplicon size (bp) |
|----------------|--------------|----------------------------------------------------|--------------------|
| aP2            | NM_053365    | F: TCACCCCAGATGACAGGAAA<br>R: CATGACACATTCCACCACCA | 140                |
| $\beta$ -actin | NM_031144    | F: GGCACCACACTTTCTACAAT<br>R: AGGTCTCAAACATGATCTGG | 123                |
| IL-6           | NM_012589    | F: ATAGTCCTTCCTACCCCAAC<br>R: TGCCGAGTAGACCTCATAGT | 143                |
| MCP-1          | NM_031530    | F: ACTCACCTGCTGCTACTCAT<br>R: CTACAGCTTCTTTGGGACAC | 101                |
| TNF- $\alpha$  | NM_012675    | F: CCCCTTTATCGTCTACTCCT<br>R: ACTACTTCAGCGTCTCGTGT | 139                |
| PPAR- $\gamma$ | NM_001145366 | F: TGTGGGGATAAAGCATCAGG<br>R: CAAGGCACTTCTGAAACCGA | 175                |

aP2, adipocyte protein 2; IL-6, interleukin-6; MCP-1, monocyte chemoattractant protein-1; PPAR- $\gamma$ , peroxisome proliferator-activated receptor- $\gamma$ ; TNF- $\alpha$ , tumor necrosis factor- $\alpha$ .
